# Supplementary material for: Patient Experiences of a Four-Week Sugar Avoidance During Periodontal Therapy: A Qualitative Analysis of a randomized controlled clinical trial
Source: Research Square preprint supplement (doi:10.21203/rs.3.rs-7779168/v1), 2025-11-10
Supplement: Supplementary file 1 [file c3d57965ea02d5e51cdc7496.docx]

Supplementary file S1

Interview questions:

1. How did the dietary change feel for you?

2. On a scale from zero to ten, how difficult was the dietary change for you? (zero = easy, ten = very difficult)

3. What aspects did you find easy?

4. What aspects did you find difficult?

5. What side effects did you notice?

6. What benefits has the dietary change had for you?

7. What kind of nutritional counseling have you previously received in the dental field?

8. What habits did you maintain after completing the sugar abstinence?

9. Did you lose weight? (Yes/No) How do you feel about the weight loss?

10. How did abstaining from sugar affect your relationship with sugar and your overall eating habits?

11. On a scale from zero to ten, how motivated are you to continue avoiding sugar? (zero = not motivated at all, ten = very motivated)

12. What are the reasons behind your motivation?

13. How did you cope with sugar cravings?

14. How did your social environment respond to the dietary change?

15. In which situations did you feel particularly challenged by the sugar abstinence?

16. How did you perceive the nutritional counseling beforehand?

17. If you would have wished for more from the counseling, what would that have been?
