# Supplementary material for: Patient Experiences of a Four-Week Sugar Avoidance During Periodontal Therapy: A Qualitative Analysis of a randomized controlled clinical trial
Source: Research Square preprint supplement (doi:10.21203/rs.3.rs-7779168/v1), 2025-11-10
Supplement: Supplementary file 2 [file e79c107bf32d58e7cc661391.docx]

Supplementary file S2

1. Sugar consumption before the intervention

2. Expectations regarding a sugar-free diet

 2.2 Positive expectations

 2.3 Negative expectations

  2.3.1 Fear of withdrawal symptoms

3. Implementation

 3.1 Criticism, wishes, and suggestions for improvement

 3.2 Nutritional counseling prior to the intervention

 3.3 Lack of knowledge, misunderstandings, and need for information

4. Evaluation of sugar abstinence

 4.1 Positive evaluations and experiences

  4.1.1 Positive reactions from the social environment

   4.1.1.1 Joint participation

  4.1.2 Implementation at home

  4.1.3 Sugar substitutes

  4.1.4 Joy of discovery and openness to new experiences

  4.1.5 Mental and physical well-being

 4.2 Negative experiences and complicating factors

  4.2.1 Psychological and physical symptoms

  4.2.2 Difficulties in food procurement

   4.2.2.1 Sugar consumption outside the home

   4.2.2.2 Dealing with hidden sugars

  4.2.3 Social exclusion

5. Conditions after the intervention

 5.1 Inspiration for others

 5.2 Positive behavioral changes

 5.3 General awareness, insights, and knowledge gain

  5.3.1 Resumption of sugar consumption in private life

  5.3.2 Normalization of hidden sugars

  5.3.3 Critical perspective on the food industry and consumer behavior

  5.3.4 Sugar consumption in society

 5.4 Mental and physical state with sugar consumption

 5.5 Motivation
